# Supplementary material
Source: PubMed Central journal article supplement (PMC6495551)
Supplement: NIHMS1523092-supplement-1.pdf [file NIHMS1523092-supplement-1.pdf]

A

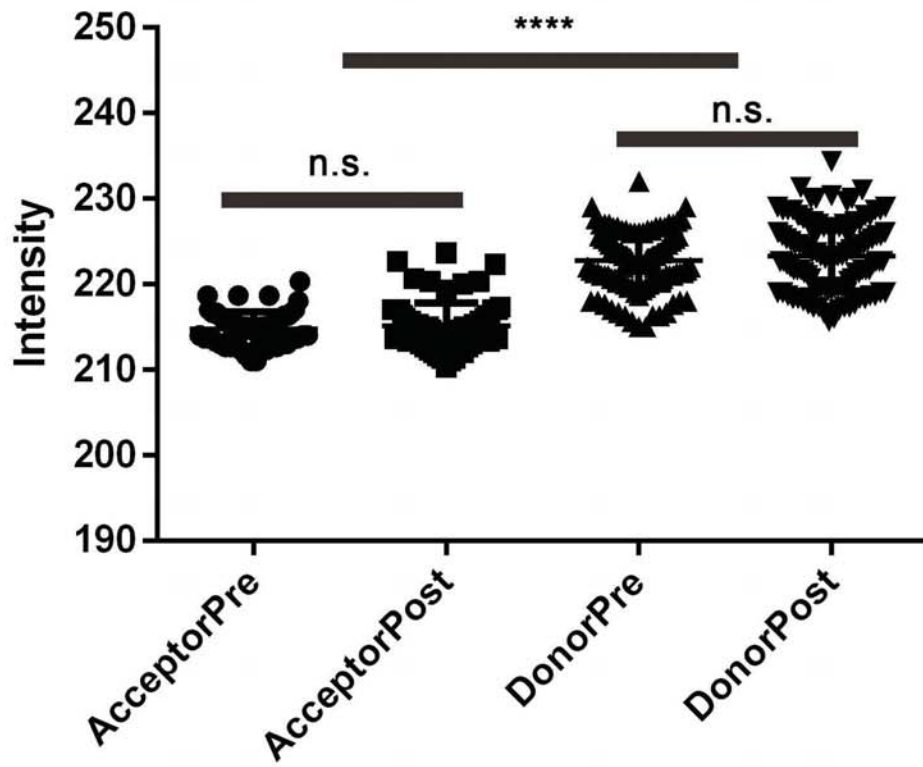

B

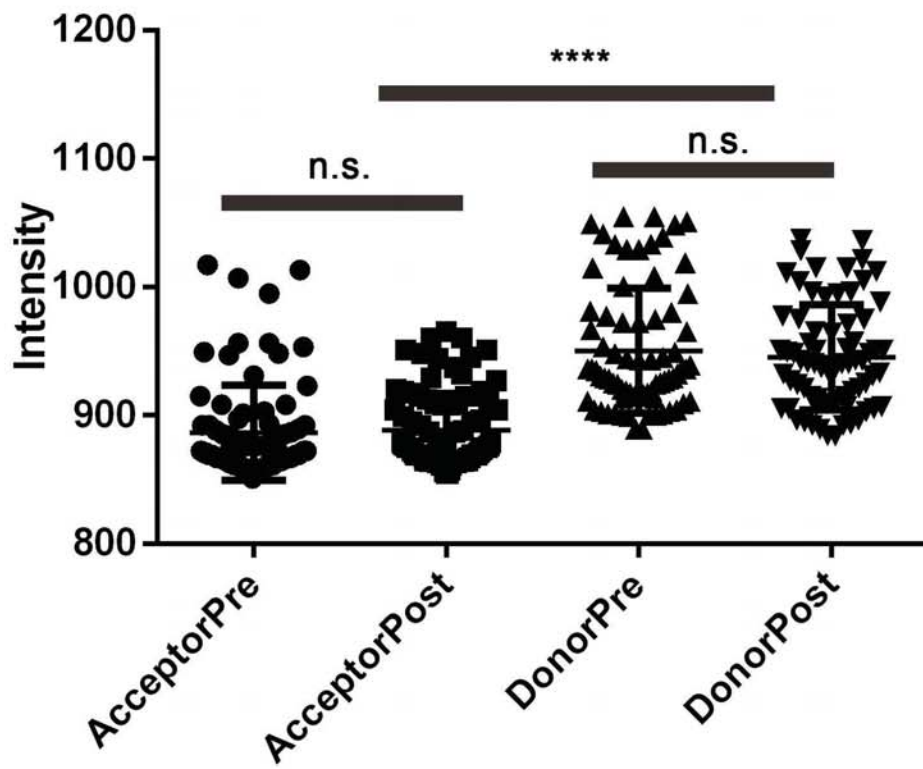

**Supplemental Figure 1.** Visualization of cytoplasmic stain intensities for donor and acceptor cells pre and post cryptococcal transfer. **A.** Event 2 and **B.** Event 1. In each event the donor (positive) and acceptor (negative) cells are distinguishable from each other ( $P < 0.0001$ ) but differences are not observed within cells post transfer. This difference is distinguishable even in Event 1 which was in the upper dynamic range of the stain.  $P$  values were calculated via unpaired two tailed t-test.

Supplemental Figure 2

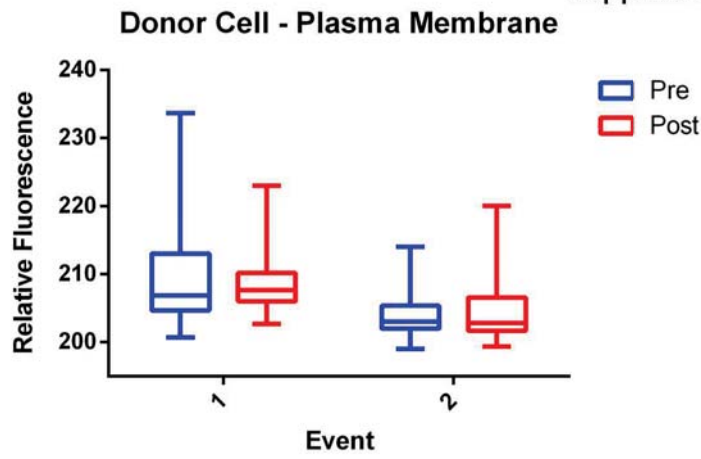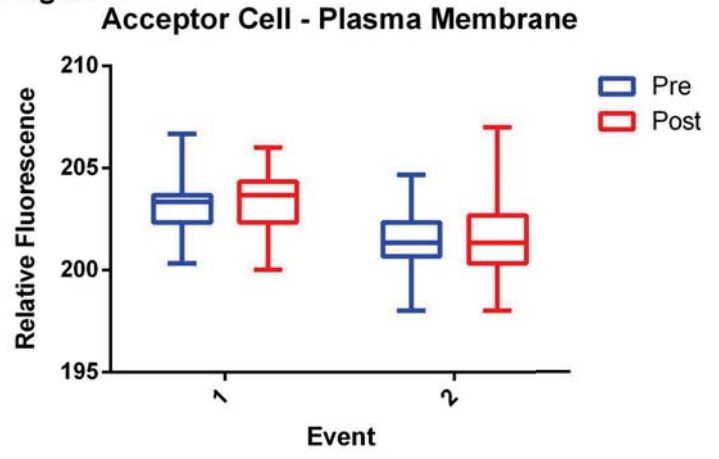

Event 1

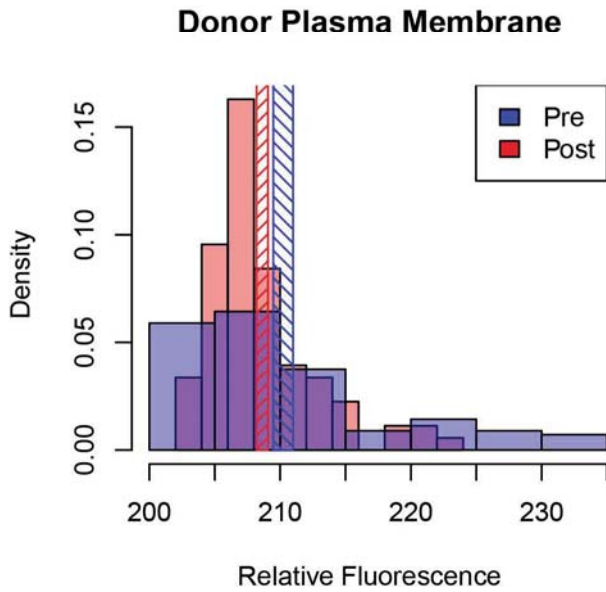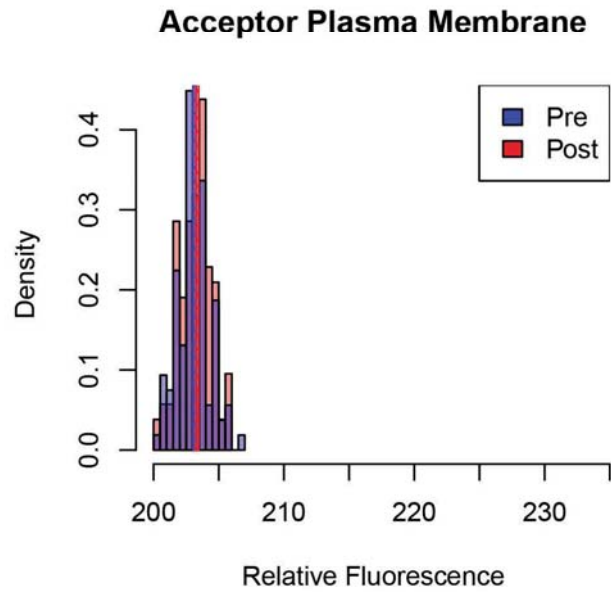

Event 2

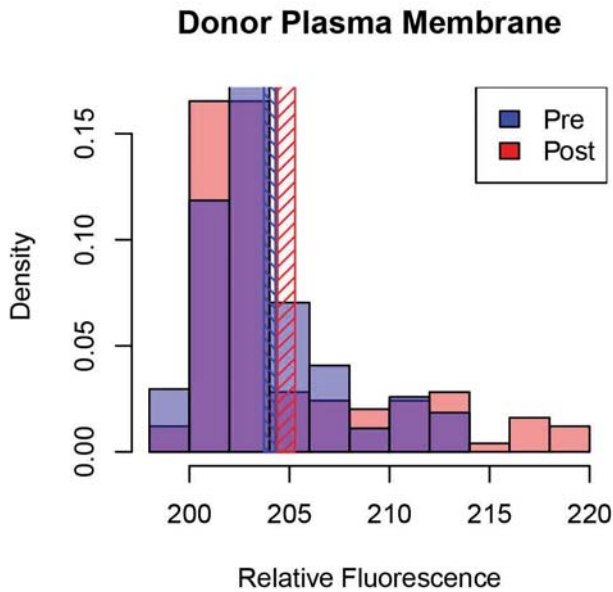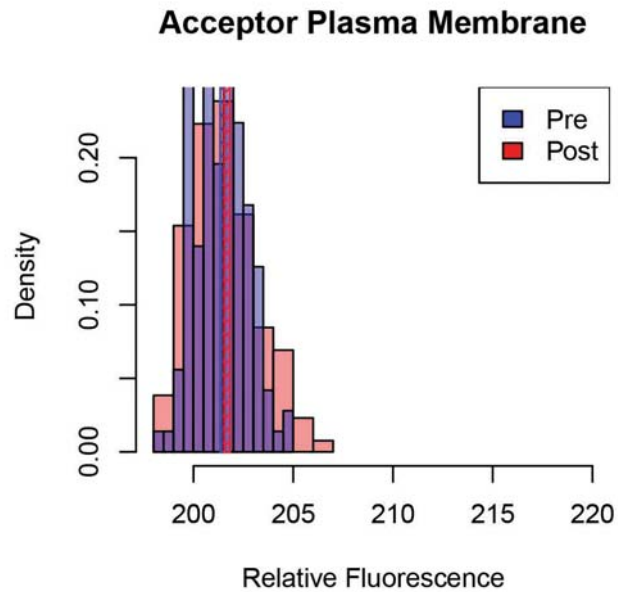

Supplemental Figure 2: Quantification of a plasma membrane marker before and after transfer events for donor and acceptor macrophages.

Supplemental Figure 3

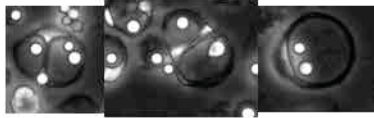

Supplemental Figure 3.  
Examples of irregular cell  
morphology when incubated  
with cytochalasin D.

Supplemental Figure 4

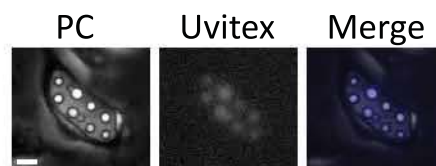

**Supplemental Figure 4.** Phagolysosome containing many *C. neoformans* cells that has begun to acquire Uvitex staining before being expelled from their host cell. (PC) Phase Contrast, (Uvitex) Uvitex 2B, and (Merge) false color channel merged images are shown. Scale bar represents 10  $\mu\text{m}$  and is consistent for each image.
