# Supplementary material
Source: PubMed Central journal article supplement (PMC6495551)
Supplement: NIHMS1523092-supplement-2.pdf [file NIHMS1523092-supplement-2.pdf]

- 1 **Supplemental Movie 1:** A high resolution microscopy video of non-lytic cell-to-cell transfer of
- 2 *C. neoformans* from one macrophage to another.
- 3
- 4 **Supplemental Movie 2:** A representative full movie of one transfer event. Cells are visualized by
- 5 phase contrast (gray), cytosolic stain (green), and Uvitex 2B (blue).
